# Supplementary material for: Monitoring Training Load, Well-Being, Heart Rate Variability, and Competitive Performance of a Functional-Fitness Female Athlete: A Case Study
Source: MDPI journal article supplement (doi:10.3390/sports7020035), 2019-02-09
Supplement: s1 [file s1]

## Supplementary Materials

### Example of a weekly training program

|              | Monday                                                                                                                                                                                                                                                                                                                                                                                                                                                        | Tuesday                                                                                                                                                                                                                                                                                                                                                                               | Wednesday                                                                                                                                                                                                                                                                                                               | Thursday | Friday                                                                                                                                                                                                                                                                                                                                                                                                                                                                                                                                   | Saturday                                                                                                                                                                                                                                                                                                           | Sunday   |
|--------------|---------------------------------------------------------------------------------------------------------------------------------------------------------------------------------------------------------------------------------------------------------------------------------------------------------------------------------------------------------------------------------------------------------------------------------------------------------------|---------------------------------------------------------------------------------------------------------------------------------------------------------------------------------------------------------------------------------------------------------------------------------------------------------------------------------------------------------------------------------------|-------------------------------------------------------------------------------------------------------------------------------------------------------------------------------------------------------------------------------------------------------------------------------------------------------------------------|----------|------------------------------------------------------------------------------------------------------------------------------------------------------------------------------------------------------------------------------------------------------------------------------------------------------------------------------------------------------------------------------------------------------------------------------------------------------------------------------------------------------------------------------------------|--------------------------------------------------------------------------------------------------------------------------------------------------------------------------------------------------------------------------------------------------------------------------------------------------------------------|----------|
| Strength     | <p>A1. Every 2 minutes, for 8 minutes (4 sets): snatch Press from Receiving x 2 reps</p> <p>A2. Every 2 minutes, for 6 minutes (3 sets): muscle Snatch x 2 reps</p> <p>A3. Every 2 minutes, for 6 minutes (3 sets): drop Snatch x 2 reps</p> <p>B. For time: 20 snatches @ 80% of 1-RM</p> <p>C. Five sets of: front squat x 3 reps @ 85% of 1-RM</p> <p>D. Three sets of: GHD weighted hip extension x 12 reps; bulgarian split squats x 8 reps each leg</p> | <p>A. Every 2 minutes, for 8 minutes (4 sets): Sott's Press x 3 reps</p> <p>B. Take 20 minutes to build to today's 1-RM: Power Clean + Power Jerk</p> <p>C. Every 2 minutes, for 20 minutes (10 sets): Split Jerk</p> <p>*Sets 1-2 = 3 reps @ 65%</p> <p>*Sets 3-4 = 3 reps @ 70%</p> <p>*Sets 5-6 = 2 reps @ 75%</p> <p>*Sets 7-8 = 2 reps @ 80%</p> <p>*Sets 9-10 = 1 rep @ 85%</p> | <p>A. Three sets of: Pause Deadlifts x 8 reps @ 62.5%</p> <p>Rest 3 minutes</p> <p>B. Three sets of: Dumbbell Floor Press x 8 reps</p> <p>Rest 2 minutes</p> <p>C. Four sets of: Dumbbell Skull Crushers x 10 reps</p> <p>Rest 2 minutes</p> <p>D. Three sets of: Back Squat x 8 reps @ 72.5%</p> <p>Rest 3 minutes</p> | Rest day | <p>A1. Every 2 minutes, for 6 minutes (3 sets) of: Snatch Press from Receiving x 3 reps</p> <p>A2. Every 2 minutes, for 6 minutes (3 sets) of: Drop Snatch x 1 rep</p> <p>B. Build to today's heavy Snatch from Hang</p> <p>Every 90 seconds, for 6 minutes (4 sets): Snatch x 1 rep</p> <p>C. Front Squat</p> <p>*Set 1 – 4 reps @ 65-70%</p> <p>*Set 2 – 3 reps @ 70-75%</p> <p>*Set 3 – 2 reps @ 75-80%</p> <p>*Set 4 – 2 reps @ 80-85%</p> <p>*Set 5 – 1 rep @ 85-90%</p> <p>*Set 6 – 1 rep @ 90%</p> <p>*Set 7 – 1 rep @ 92-95%</p> | <p>A. Build to today's 1-RM Clean &amp; Jerk</p> <p>B. Every 90 seconds, for 6 minutes (4 sets): Clean &amp; Jerk x 1 rep @ 90% of today's 1RM</p> <p>C. Three sets of: Split Stance Romanian Deadlift x 8 reps each leg</p> <p>Rest 60 seconds</p> <p>Kettlebell Biceps Curls x 8 reps</p> <p>Rest 60 seconds</p> | Rest day |
| Conditioning | <p>Every 10 minutes, for 30 minutes (3 sets):</p> <p>20 sandbag squats (150/100 lbs)</p> <p>400 m run</p> <p>10 muscle-ups</p> <p>20 sandbag squats (150/100 lbs)</p> <p>400 m run</p>                                                                                                                                                                                                                                                                        | <p>For time:</p> <p>30 Chest-to-Bar Pull-Ups</p> <p>6 Ground to Overhead (245/165 lbs)</p> <p>20 Chest-to-Bar Pull-Ups</p> <p>4 Ground to Overhead</p> <p>10 Chest-to-Bar Pull-Ups</p> <p>2 Ground to Overhead</p>                                                                                                                                                                    | <p>A. Three rounds for time of:</p> <p>15 Dumbbell Thrusters (50/35 lbs)</p> <p>12 Toes-to-Bar</p> <p>9 Burpees Over the Dumbbells</p> <p>B. For time:</p> <p>100 Double-Unders</p> <p>500 Meter Row</p> <p>50 Alternating Pistols</p> <p>500 Meter Row</p> <p>100 Double-Unders</p>                                    |          | <p>Four sets for times of:</p> <p>10 Muscle-Ups</p> <p>20 Box Jump-Overs</p> <p>30 Dumbbell Snatches (50/35 lbs)</p> <p>400 Meter Run</p> <p>Rest 4 minutes</p>                                                                                                                                                                                                                                                                                                                                                                          | <p>Every minute, on the minute, for 21 minutes:</p> <p>Minute 1: 8 Burpee Dumbbell Thrusters (35/25 lbs)</p> <p>Minute 2: 15/10 Calorie Assault Bike</p> <p>Minute 3: 15 Pull-Ups</p>                                                                                                                              |          |

|            |                                                                                                                                                                                                                                                                                                            |                                                                                                                                                                                                                                                                                                                           |                                                                                                                                                                                                                                                                                      |                                                                                                                                                                                                                                                                                                                                                                                |                                                                                                                                                                                                                                                                                                                                                                                                                             |
|------------|------------------------------------------------------------------------------------------------------------------------------------------------------------------------------------------------------------------------------------------------------------------------------------------------------------|---------------------------------------------------------------------------------------------------------------------------------------------------------------------------------------------------------------------------------------------------------------------------------------------------------------------------|--------------------------------------------------------------------------------------------------------------------------------------------------------------------------------------------------------------------------------------------------------------------------------------|--------------------------------------------------------------------------------------------------------------------------------------------------------------------------------------------------------------------------------------------------------------------------------------------------------------------------------------------------------------------------------|-----------------------------------------------------------------------------------------------------------------------------------------------------------------------------------------------------------------------------------------------------------------------------------------------------------------------------------------------------------------------------------------------------------------------------|
| Accessory  | <p>Strength Accessory Option</p> <p>A. Every minute, on the minute, for 7 minutes: 5 supinated grip bent over barbell rows<br/>10 second max effort assault bike sprint</p> <p>B. Three sets of: sandbag squat x max reps<br/>100 meter sled push</p> <p>C. Three sets of: harnessed bear crawl x 30 m</p> | <p>Strength Accessory Option</p> <p>A. Three sets of: EZ-Bar Bicep Curl x 10 reps<br/>Rest 30 seconds<br/>EZ-Bar Tricep Extension x 10 reps<br/>Rest 60 seconds</p> <p>B. Three sets of: Hanging Straight Leg Raises x AMRAP<br/>Rest 90 seconds<br/>Extended Plank x 60 seconds<br/>Med Ball Slams x 20 second AMRAP</p> | <p>Strength Accessory Option</p> <p>Three sets of: Double Kettlebell Romanian Deadlift x 12 reps<br/>Rest as needed<br/>Single-Leg Barbell Glute Bridge x 10 reps each leg<br/>Rest as needed</p>                                                                                    | <p>Strength Accessory Option</p> <p>A. Two sets for max reps of: 60 seconds of Stiff Leg Deadlift @ 25% of 1-RM Deadlift<br/>Rest 60 seconds</p> <p>B. In 12 minutes build to today's 3-RM Sumo Deadlift</p> <p>C. Two sets of: Deadlift x Max Reps @ 75% of 1-RM<br/>Heavy Sandbag Carry for max distance<br/>Rest 90 seconds</p> <p>D. One set of: 200 Meter Sled Sprint</p> | <p>Strength Accessory Option</p> <p>A. Three sets of: Supinated-Grip Chinese Barbell Rows x 8-10 reps<br/>Rest as needed</p> <p>B. Three Sets of: Half-Kneeling Landmine Rotations (right side) x 10 reps<br/>Rest 30 seconds<br/>Right Side Plank x 30 seconds<br/>Rest 60 seconds<br/>Half-Kneeling Landmine Rotations (left side) x 10 reps<br/>Rest 30 seconds<br/>Left Side Plank x 30 seconds<br/>Rest 60 seconds</p> |
| Gymnastics |                                                                                                                                                                                                                                                                                                            | <p>Aerobic/Gymnastics Option</p> <p>Every 8 minutes, for 24 minutes (3 sets) of: 40/30 Calorie Assault Bike<br/>5 Bar Muscle Ups<br/>10 Strict Handstand Push Ups to 10/5 cm Deficit<br/>5 Bar Muscle Ups</p>                                                                                                             | <p>Strict Gymnastics Volume Accumulation Option</p> <p>Six sets of: Ring Support Hold x 20 seconds<br/>Rest 15 seconds<br/>Strict Toes to Bar x 10 reps<br/>Rest 15 seconds<br/>Ring Dip Hold x 20 Seconds<br/>Rest 15 seconds<br/>Strict Pull-Ups x Max Reps<br/>Rest as needed</p> | <p>Four sets of: Supinated-Grip Strict L-Pull Ups x 3-5 reps<br/>Rest 60 seconds<br/>Handstand Walk x 30mts<br/>Rest 60 seconds<br/>Rope Climb x 2 ascents<br/>Rest as needed</p>                                                                                                                                                                                              |                                                                                                                                                                                                                                                                                                                                                                                                                             |
| Endurance  | <p>Assault Bike Conditioning Option: Every 2 minutes, for 14 minutes (7 sets) of: 25 Calories of Assault Bike</p>                                                                                                                                                                                          |                                                                                                                                                                                                                                                                                                                           | <p>Six sets for times of: 60 seconds max Calorie Ski-Erg<br/>60 seconds max Calorie Row</p>                                                                                                                                                                                          | <p>Assault Bike Conditioning Option</p> <p>Two sets of: 10 minutes of Assault Bike<br/>Rest 5 Minutes</p>                                                                                                                                                                                                                                                                      | <p>Running Endurance Option</p> <p>Four sets for times of: Run 2000 Meters @ 80-85% of 1-Mile Pace<br/>Rest 2 minutes</p>                                                                                                                                                                                                                                                                                                   |

---

Running Endurance  
Option  
Six sets of:  
Run 200 Meters @ 100%  
of 1-Mile Pace  
Rest 60 seconds  
Run 200 Meters @ 100%  
of 1-Mile Pace  
Rest 60 seconds  
Run 400 Meters @ 80%  
of 1-Mile Pace  
Rest 60 seconds

60 seconds max Calorie  
Assault Bike  
60 seconds Sand Bag  
Bear Hug Hold  
(HEAVY)  
Rest 2 minutes

Rowing Endurance Option  
Two sets for times of:  
Row 4000 Meters  
Rest 4 minutes

---
